# Supplementary material for: AuNCs–LHRHa nano-system for FL/CT dual-mode imaging and photothermal therapy of targeted prostate cancer
Source: Royal Society of Chemistry journal article supplement (doi:10.1039/d2tb00531j), 2022-01-01
Supplement: d2tb00531j1.pdf [file d2tb00531j1.pdf]

# AuNCs-LHRHa Nano-System for FL/CT Dual-Mode Imaging and Photothermal Therapy of Targeted Prostate Cancer

## Supporting Information

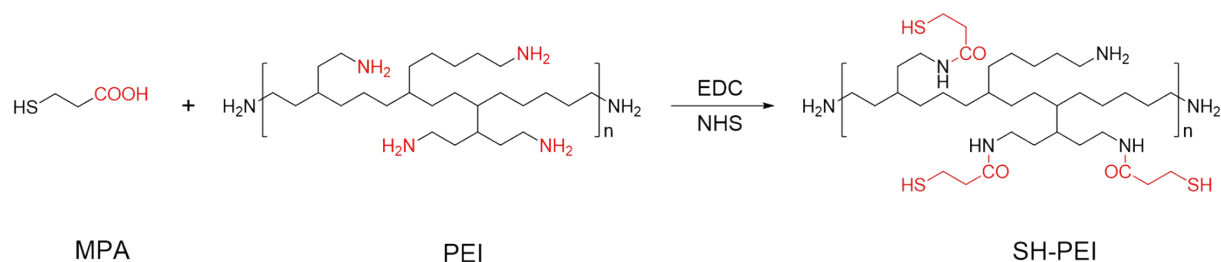

Figure S1. The reaction process of the ligand (SH-PEI).

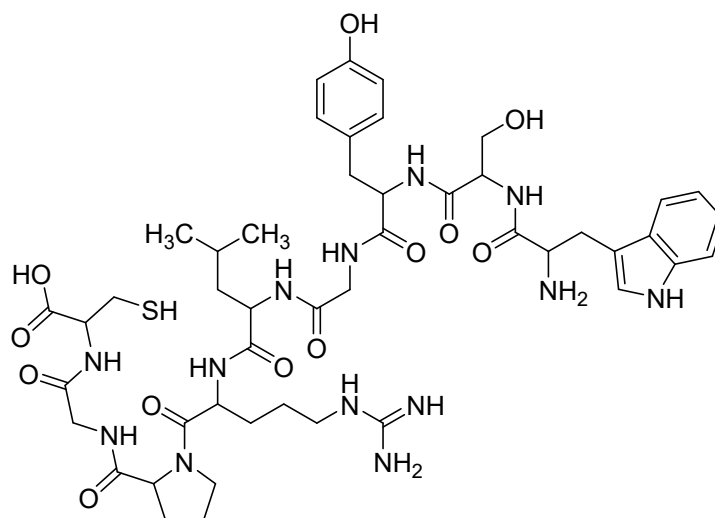

Figure S2. The structure of LHRHa.

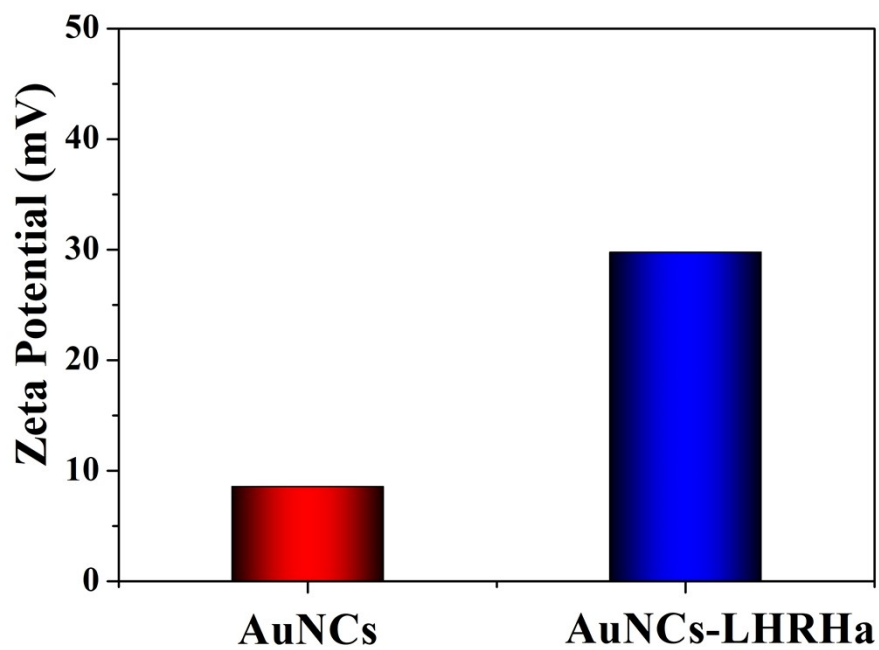

Figure S3. Zeta potential of AuNCs and AuNCs-LHRHa.

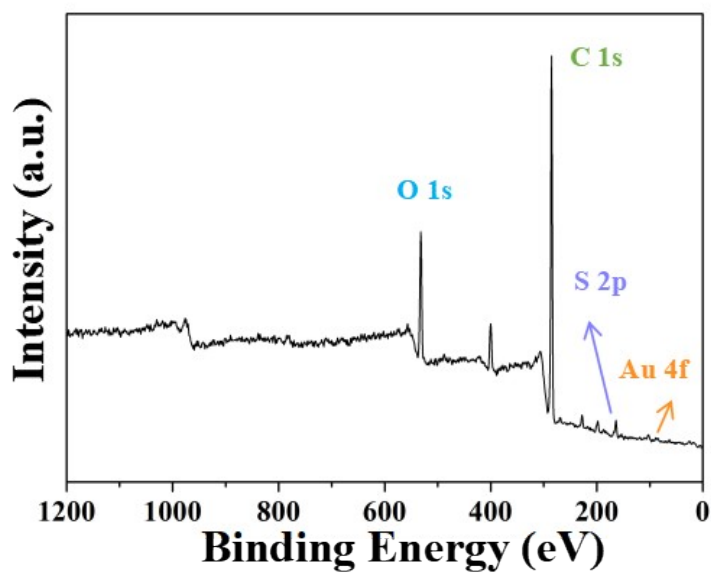

Figure S4. XPS survey spectrum of AuNCs-LHRHa.

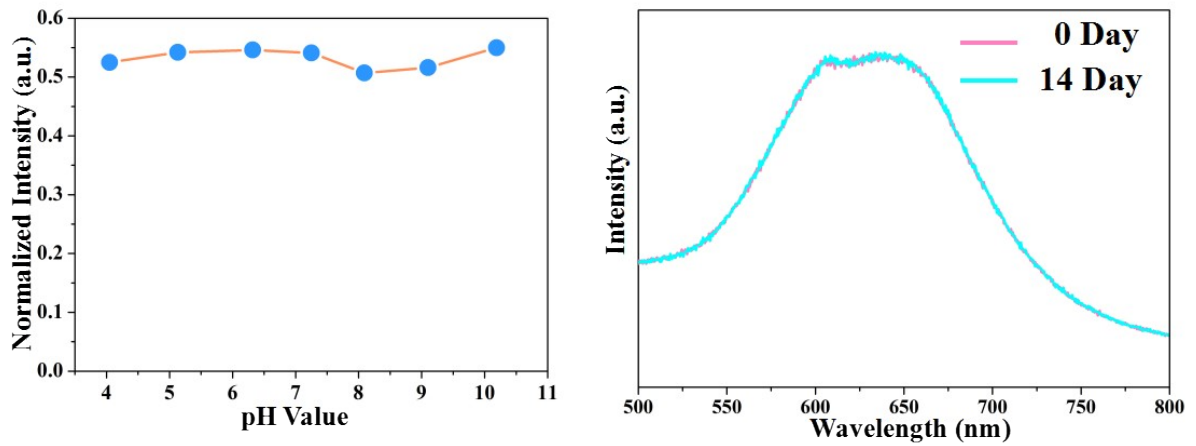

Figure S5. The fluorescence stability of AuNCs-LHRHa. Fluorescence intensities of AuNCs-LHRHa at different pH value (a) and storing under normal condition for two weeks (b).

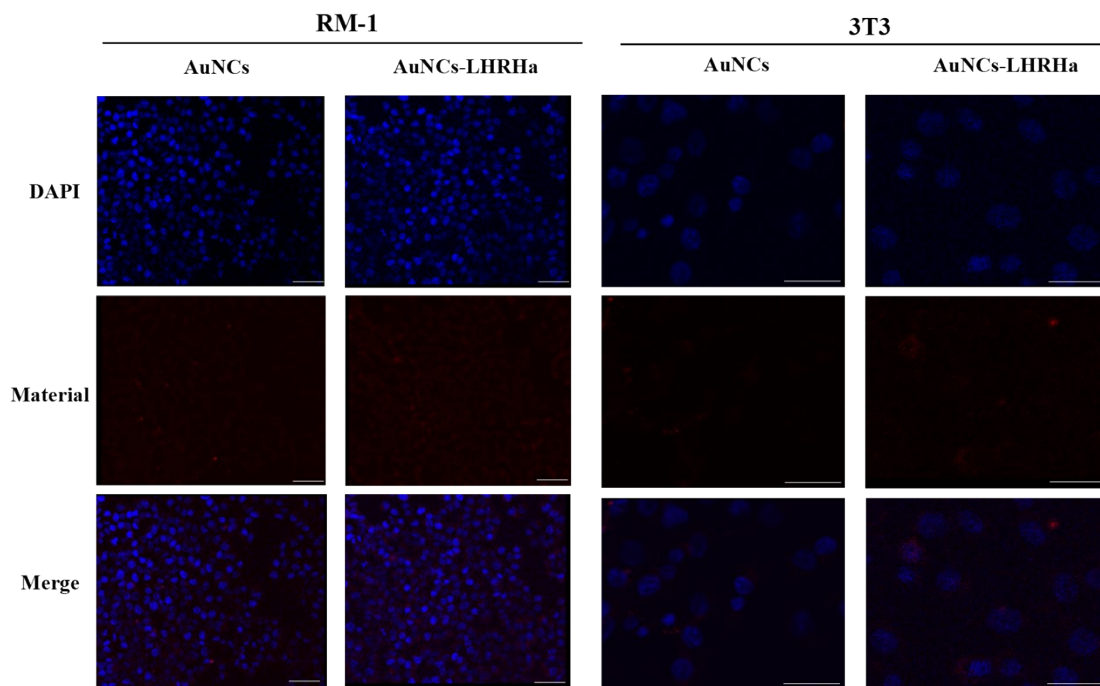

Figure S6. In vitro cell uptake by RM-1 cells and 3T3 cultured with AuNCs and AuNCs-LHRHa for 3 h, as detected by CLSM. Scale bar: 40  $\mu\text{m}$

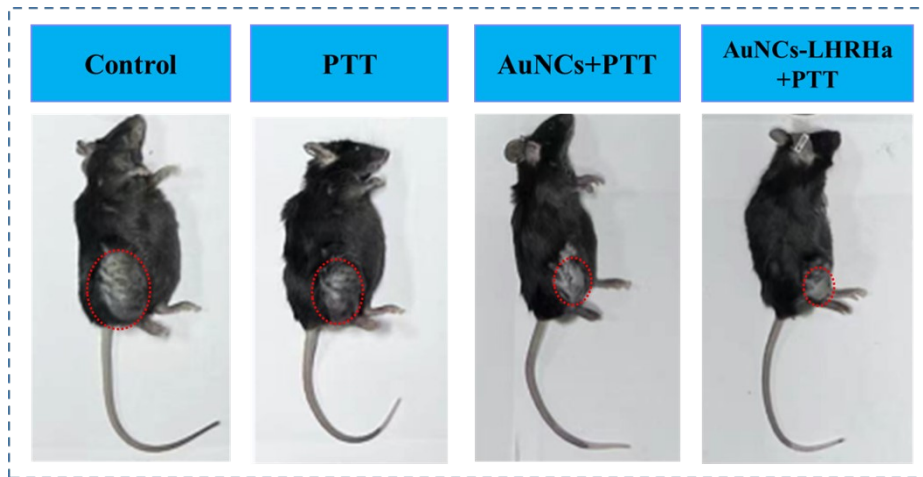

Figure S7. Photograph of mouse in each group was taken at the 8th day during the treatment.
